# Supplementary material
Source: MDPI journal article supplement (https://www.mdpi.com/2071-1050/11/24/6929)
Supplement: s1 [file s1]

## Supplementary Information

### Application of Ostrom's social-ecological systems framework in nature reserves: Hybrid psycho-economic model of collective forest management

Xie et al.

**Supplementary Table 1.** Primary information of the sample nature reserves

|                        | TNR                                      | DNR                                              | GPR                       |
|------------------------|------------------------------------------|--------------------------------------------------|---------------------------|
| Creation year          | 1995                                     | 1985                                             | 1996                      |
| Year promoted as PNR   | 2001                                     | 2003                                             | 1999                      |
| Year promoted as NNR   | 2014                                     | 2005                                             | —                         |
| Area (ha)              | 10,379.7                                 | 13,472.4                                         | 1509.32                   |
| Forest area (ha)       | 9797.9                                   | 12,967.5                                         | 1289.83                   |
| Collective forest (ha) | 7488.1                                   | 12,166.4                                         | 1289.83                   |
| Conservation objects   | • ever-green broad-leaf forest ecosystem | • largest and best-preserved <i>P. Taiwanese</i> | • unique forest ecosystem |

Source: Authors collected from fieldwork survey

**Supplementary Table 2.** Questionnaire on collective forest management in national nature reserve

*Part I. Regulations on collective forest management in nature reserves*

| Relevant provisions                                                        | Core area                                                                                                                                                                                               | Buffer                                                                                                                                                                                                  | Test area                                                                                                                                                                                               |
|----------------------------------------------------------------------------|---------------------------------------------------------------------------------------------------------------------------------------------------------------------------------------------------------|---------------------------------------------------------------------------------------------------------------------------------------------------------------------------------------------------------|---------------------------------------------------------------------------------------------------------------------------------------------------------------------------------------------------------|
| 1. Should artificial arbor forests in collective forests can be harvested? | <input type="checkbox"/> Cannot be harvested<br><input type="checkbox"/> Yes, it does not need approval<br><input type="checkbox"/> Yes, it does need approval<br><input type="checkbox"/> Other: _____ | <input type="checkbox"/> Cannot be harvested<br><input type="checkbox"/> Yes, it does not need approval<br><input type="checkbox"/> Yes, it does need approval<br><input type="checkbox"/> Other: _____ | <input type="checkbox"/> Cannot be harvested<br><input type="checkbox"/> Yes, it does not need approval<br><input type="checkbox"/> Yes, it does need approval<br><input type="checkbox"/> Other: _____ |
| 2. Should bamboo forests in collective forests be felled?                  | <input type="checkbox"/> Cannot be felled<br><input type="checkbox"/> Yes, it does not need approval<br><input type="checkbox"/> Yes, it does need approval<br><input type="checkbox"/> Other: _____    | <input type="checkbox"/> Cannot be felled<br><input type="checkbox"/> Yes, it does not need approval<br><input type="checkbox"/> Yes, it does need approval<br><input type="checkbox"/> Other: _____    | <input type="checkbox"/> Cannot be felled<br><input type="checkbox"/> Yes, it does not need approval<br><input type="checkbox"/> Yes, it does need approval<br><input type="checkbox"/> Other: _____    |
| 3. Should the economic forest of collective forest be used as a resource?  | <input type="checkbox"/> Cannot be used<br><input type="checkbox"/> Yes, it does not need approval<br><input type="checkbox"/> Yes, it does need approval<br><input type="checkbox"/> Other: _____      | <input type="checkbox"/> Cannot be used<br><input type="checkbox"/> Yes, it does not need approval<br><input type="checkbox"/> Yes, it does need approval<br><input type="checkbox"/> Other: _____      | <input type="checkbox"/> Cannot be used<br><input type="checkbox"/> Yes, it does not need approval<br><input type="checkbox"/> Yes, it does need approval<br><input type="checkbox"/> Other: _____      |
| 4. Should residential buildings be built?                                  | <input type="checkbox"/> Cannot be built<br><input type="checkbox"/> Yes, it does not need approval<br><input type="checkbox"/> Yes, it does need approval<br><input type="checkbox"/> Other: _____     | <input type="checkbox"/> Cannot be built<br><input type="checkbox"/> Yes, it does not need approval<br><input type="checkbox"/> Yes, it does need approval<br><input type="checkbox"/> Other: _____     | <input type="checkbox"/> Cannot be built<br><input type="checkbox"/> Yes, it does not need approval<br><input type="checkbox"/> Yes, it does need approval<br><input type="checkbox"/> Other: _____     |
| 5. Should undergrowth be developed?                                        | <input type="checkbox"/> Cannot be developed<br><input type="checkbox"/> Yes, it does not need approval<br><input type="checkbox"/> Yes, it does need approval<br><input type="checkbox"/> Other: _____ | <input type="checkbox"/> Cannot be developed<br><input type="checkbox"/> Yes, it does not need approval<br><input type="checkbox"/> Yes, it does need approval<br><input type="checkbox"/> Other: _____ | <input type="checkbox"/> Cannot be developed<br><input type="checkbox"/> Yes, it does not need approval<br><input type="checkbox"/> Yes, it does need approval<br><input type="checkbox"/> Other: _____ |
| 6. Should under forest farming be developed?                               | <input type="checkbox"/> Cannot be developed<br><input type="checkbox"/> Yes, it does not need approval<br><input type="checkbox"/> Yes, it does need approval<br><input type="checkbox"/> Other: _____ | <input type="checkbox"/> Cannot be developed<br><input type="checkbox"/> Yes, it does not need approval<br><input type="checkbox"/> Yes, it does need approval<br><input type="checkbox"/> Other: _____ | <input type="checkbox"/> Cannot be developed<br><input type="checkbox"/> Yes, it does not need approval<br><input type="checkbox"/> Yes, it does need approval<br><input type="checkbox"/> Other: _____ |
| 7. Should forest tourism be developed?                                     | <input type="checkbox"/> Cannot be developed<br><input type="checkbox"/> Yes, it does not need approval<br><input type="checkbox"/> Yes, it does need approval<br><input type="checkbox"/> Other: _____ | <input type="checkbox"/> Cannot be developed<br><input type="checkbox"/> Yes, it does not need approval<br><input type="checkbox"/> Yes, it does need approval<br><input type="checkbox"/> Other: _____ | <input type="checkbox"/> Cannot be developed<br><input type="checkbox"/> Yes, it does not need approval<br><input type="checkbox"/> Yes, it does need approval<br><input type="checkbox"/> Other: _____ |

*Part II. Collective forest management conflicts in nature reserves*

| Relevant provisions                                                                              | Core area                                                                                                                                                                                                                     | Buffer                                                                                                                                                                                                                        | Test area                                                                                                                                                                                                                     |
|--------------------------------------------------------------------------------------------------|-------------------------------------------------------------------------------------------------------------------------------------------------------------------------------------------------------------------------------|-------------------------------------------------------------------------------------------------------------------------------------------------------------------------------------------------------------------------------|-------------------------------------------------------------------------------------------------------------------------------------------------------------------------------------------------------------------------------|
| 8. Has there ever been a conflict that did not allow villagers to cut down plantations?          | <input type="checkbox"/> No<br><input type="checkbox"/> Yes, but not serious<br><input type="checkbox"/> Yes, moderate dispute<br><input type="checkbox"/> Yes, very serious dispute<br><input type="checkbox"/> Other: _____ | <input type="checkbox"/> No<br><input type="checkbox"/> Yes, but not serious<br><input type="checkbox"/> Yes, moderate dispute<br><input type="checkbox"/> Yes, very serious dispute<br><input type="checkbox"/> Other: _____ | <input type="checkbox"/> No<br><input type="checkbox"/> Yes, but not serious<br><input type="checkbox"/> Yes, moderate dispute<br><input type="checkbox"/> Yes, very serious dispute<br><input type="checkbox"/> Other: _____ |
| 9. Has there ever been a conflict that did not allow villagers to cut bamboo?                    | <input type="checkbox"/> No<br><input type="checkbox"/> Yes, but not serious<br><input type="checkbox"/> Yes, moderate dispute<br><input type="checkbox"/> Yes, very serious dispute<br><input type="checkbox"/> Other: _____ | <input type="checkbox"/> No<br><input type="checkbox"/> Yes, but not serious<br><input type="checkbox"/> Yes, moderate dispute<br><input type="checkbox"/> Yes, very serious dispute<br><input type="checkbox"/> Other: _____ | <input type="checkbox"/> No<br><input type="checkbox"/> Yes, but not serious<br><input type="checkbox"/> Yes, moderate dispute<br><input type="checkbox"/> Yes, very serious dispute<br><input type="checkbox"/> Other: _____ |
| 10. Has there ever been a conflict that did not allow villagers to use economic forests?         | <input type="checkbox"/> No<br><input type="checkbox"/> Yes, but not serious<br><input type="checkbox"/> Yes, moderate dispute<br><input type="checkbox"/> Yes, very serious dispute<br><input type="checkbox"/> Other: _____ | <input type="checkbox"/> No<br><input type="checkbox"/> Yes, but not serious<br><input type="checkbox"/> Yes, moderate dispute<br><input type="checkbox"/> Yes, very serious dispute<br><input type="checkbox"/> Other: _____ | <input type="checkbox"/> No<br><input type="checkbox"/> Yes, but not serious<br><input type="checkbox"/> Yes, moderate dispute<br><input type="checkbox"/> Yes, very serious dispute<br><input type="checkbox"/> Other: _____ |
| 11. Has there ever been a conflict that did not allow villagers to build houses?                 | <input type="checkbox"/> No<br><input type="checkbox"/> Yes, but not serious<br><input type="checkbox"/> Yes, moderate dispute<br><input type="checkbox"/> Yes, very serious dispute<br><input type="checkbox"/> Other: _____ | <input type="checkbox"/> No<br><input type="checkbox"/> Yes, but not serious<br><input type="checkbox"/> Yes, moderate dispute<br><input type="checkbox"/> Yes, very serious dispute<br><input type="checkbox"/> Other: _____ | <input type="checkbox"/> No<br><input type="checkbox"/> Yes, but not serious<br><input type="checkbox"/> Yes, moderate dispute<br><input type="checkbox"/> Yes, very serious dispute<br><input type="checkbox"/> Other: _____ |
| 12. Has there ever been a conflict that did not allow villagers to develop undergrowth?          | <input type="checkbox"/> No<br><input type="checkbox"/> Yes, but not serious<br><input type="checkbox"/> Yes, moderate dispute<br><input type="checkbox"/> Yes, very serious dispute<br><input type="checkbox"/> Other: _____ | <input type="checkbox"/> No<br><input type="checkbox"/> Yes, but not serious<br><input type="checkbox"/> Yes, moderate dispute<br><input type="checkbox"/> Yes, very serious dispute<br><input type="checkbox"/> Other: _____ | <input type="checkbox"/> No<br><input type="checkbox"/> Yes, but not serious<br><input type="checkbox"/> Yes, moderate dispute<br><input type="checkbox"/> Yes, very serious dispute<br><input type="checkbox"/> Other: _____ |
| 13. Has there ever been a conflict that did not allow villagers to develop under-forest farming? | <input type="checkbox"/> No<br><input type="checkbox"/> Yes, but not serious<br><input type="checkbox"/> Yes, moderate dispute<br><input type="checkbox"/> Yes, very serious dispute<br><input type="checkbox"/> Other: _____ | <input type="checkbox"/> No<br><input type="checkbox"/> Yes, but not serious<br><input type="checkbox"/> Yes, moderate dispute<br><input type="checkbox"/> Yes, very serious dispute<br><input type="checkbox"/> Other: _____ | <input type="checkbox"/> No<br><input type="checkbox"/> Yes, but not serious<br><input type="checkbox"/> Yes, moderate dispute<br><input type="checkbox"/> Yes, very serious dispute<br><input type="checkbox"/> Other: _____ |

|                                                                                            |                                                                                                                                                                                                                               |                                                                                                                                                                                                                               |                                                                                                                                                                                                                               |
|--------------------------------------------------------------------------------------------|-------------------------------------------------------------------------------------------------------------------------------------------------------------------------------------------------------------------------------|-------------------------------------------------------------------------------------------------------------------------------------------------------------------------------------------------------------------------------|-------------------------------------------------------------------------------------------------------------------------------------------------------------------------------------------------------------------------------|
| 14. Has there ever been a conflict that did not allow villagers to develop forest tourism? | <input type="checkbox"/> No<br><input type="checkbox"/> Yes, but not serious<br><input type="checkbox"/> Yes, moderate dispute<br><input type="checkbox"/> Yes, very serious dispute<br><input type="checkbox"/> Other: _____ | <input type="checkbox"/> No<br><input type="checkbox"/> Yes, but not serious<br><input type="checkbox"/> Yes, moderate dispute<br><input type="checkbox"/> Yes, very serious dispute<br><input type="checkbox"/> Other: _____ | <input type="checkbox"/> No<br><input type="checkbox"/> Yes, but not serious<br><input type="checkbox"/> Yes, moderate dispute<br><input type="checkbox"/> Yes, very serious dispute<br><input type="checkbox"/> Other: _____ |
|--------------------------------------------------------------------------------------------|-------------------------------------------------------------------------------------------------------------------------------------------------------------------------------------------------------------------------------|-------------------------------------------------------------------------------------------------------------------------------------------------------------------------------------------------------------------------------|-------------------------------------------------------------------------------------------------------------------------------------------------------------------------------------------------------------------------------|

*Part III. Community management and supporting measures of collective forests in nature reserves*

| Relevant provisions                                                                                          | Core area                                                                                                                                                                                                                                                                                                                                                            | Buffer                                                                                                                                                                                                                                                                                                                                                               | Test area                                                                                                                                                                                                                                                                                                                                                            |
|--------------------------------------------------------------------------------------------------------------|----------------------------------------------------------------------------------------------------------------------------------------------------------------------------------------------------------------------------------------------------------------------------------------------------------------------------------------------------------------------|----------------------------------------------------------------------------------------------------------------------------------------------------------------------------------------------------------------------------------------------------------------------------------------------------------------------------------------------------------------------|----------------------------------------------------------------------------------------------------------------------------------------------------------------------------------------------------------------------------------------------------------------------------------------------------------------------------------------------------------------------|
| 15. Should there be a strict degree of management of plantation and natural forests?                         | <input type="checkbox"/> Yes, same degree for both<br><input type="checkbox"/> Yes, but not excessive levels of management<br><input type="checkbox"/> No, management should not be strict<br><input type="checkbox"/> Different levels are needed for plantations and natural forests<br><input type="checkbox"/> Other: _____                                      | <input type="checkbox"/> Yes, same degree for both<br><input type="checkbox"/> Yes, but not excessive levels of management<br><input type="checkbox"/> No, management should not be strict<br><input type="checkbox"/> Different levels are needed for plantations and natural forests<br><input type="checkbox"/> Other: _____                                      | <input type="checkbox"/> Yes, same degree for both<br><input type="checkbox"/> Yes, but not excessive levels of management<br><input type="checkbox"/> No, management should not be strict<br><input type="checkbox"/> Different levels are needed for plantations and natural forests<br><input type="checkbox"/> Other: _____                                      |
| 16. Are villagers satisfied with the amount of ecological compensation provided to them?                     | <input type="checkbox"/> Dissatisfied<br><input type="checkbox"/> Satisfied<br><input type="checkbox"/> Unclear<br><input type="checkbox"/> Other: _____                                                                                                                                                                                                             | <input type="checkbox"/> Dissatisfied<br><input type="checkbox"/> Satisfied<br><input type="checkbox"/> Unclear<br><input type="checkbox"/> Other: _____                                                                                                                                                                                                             | <input type="checkbox"/> Dissatisfied<br><input type="checkbox"/> Satisfied<br><input type="checkbox"/> Unclear<br><input type="checkbox"/> Other: _____                                                                                                                                                                                                             |
| 17. Should there be a disbursement mode of ecological compensation amount?                                   | <input type="checkbox"/> Distribution from local government to village committee<br><input type="checkbox"/> Distribution from local government to villagers<br><input type="checkbox"/> Distribution from protected areas to village committees<br><input type="checkbox"/> Distribution from protected areas to villagers<br><input type="checkbox"/> Other: _____ | <input type="checkbox"/> Distribution from local government to village committee<br><input type="checkbox"/> Distribution from local government to villagers<br><input type="checkbox"/> Distribution from protected areas to village committees<br><input type="checkbox"/> Distribution from protected areas to villagers<br><input type="checkbox"/> Other: _____ | <input type="checkbox"/> Distribution from local government to village committee<br><input type="checkbox"/> Distribution from local government to villagers<br><input type="checkbox"/> Distribution from protected areas to village committees<br><input type="checkbox"/> Distribution from protected areas to villagers<br><input type="checkbox"/> Other: _____ |
| 18. Do protected areas authority have funds other than ecological compensation for local village committees? | <input type="checkbox"/> No<br><input type="checkbox"/> Yes, central financed projects<br><input type="checkbox"/> Yes, provincial financial projects<br><input type="checkbox"/> Yes, Other: _____                                                                                                                                                                  | <input type="checkbox"/> No<br><input type="checkbox"/> Yes, central financed projects<br><input type="checkbox"/> Yes, provincial financial projects<br><input type="checkbox"/> Yes, Other: _____                                                                                                                                                                  | <input type="checkbox"/> No<br><input type="checkbox"/> Yes, central financed projects<br><input type="checkbox"/> Yes, provincial financial projects<br><input type="checkbox"/> Yes, Other: _____                                                                                                                                                                  |
| 19. Have you ever supported villagers to                                                                     | <input type="checkbox"/> No<br><input type="checkbox"/> Yes, it works very well                                                                                                                                                                                                                                                                                      | <input type="checkbox"/> No<br><input type="checkbox"/> Yes, it works very well                                                                                                                                                                                                                                                                                      | <input type="checkbox"/> No<br><input type="checkbox"/> Yes, it works very well                                                                                                                                                                                                                                                                                      |

|                                                                                          |                                                                                                                                                                                                                  |                                                                                                                                                                                                                  |                                                                                                                                                                                                                  |
|------------------------------------------------------------------------------------------|------------------------------------------------------------------------------------------------------------------------------------------------------------------------------------------------------------------|------------------------------------------------------------------------------------------------------------------------------------------------------------------------------------------------------------------|------------------------------------------------------------------------------------------------------------------------------------------------------------------------------------------------------------------|
| carry out energy conservation and utilization projects such as firewood?                 | <input type="checkbox"/> Yes, the effect is general<br><input type="checkbox"/> Yes, the effect is not good<br><input type="checkbox"/> Other: _____                                                             | <input type="checkbox"/> Yes, the effect is general<br><input type="checkbox"/> Yes, the effect is not good<br><input type="checkbox"/> Other: _____                                                             | <input type="checkbox"/> Yes, the effect is general<br><input type="checkbox"/> Yes, the effect is not good<br><input type="checkbox"/> Other: _____                                                             |
| 20. Should villagers have support in carrying out forest by-product business activities? | <input type="checkbox"/> No<br><input type="checkbox"/> Yes, central financed projects<br><input type="checkbox"/> Yes, provincial financial projects<br><input type="checkbox"/> Yes, Other: _____              | <input type="checkbox"/> No<br><input type="checkbox"/> Yes, central financed projects<br><input type="checkbox"/> Yes, provincial financial projects<br><input type="checkbox"/> Yes, Other: _____              | <input type="checkbox"/> No<br><input type="checkbox"/> Yes, central financed projects<br><input type="checkbox"/> Yes, provincial financial projects<br><input type="checkbox"/> Yes, Other: _____              |
| 21. Should villagers have support in carrying out forest ecotourism activities?          | <input type="checkbox"/> No<br><input type="checkbox"/> Yes, central financed projects<br><input type="checkbox"/> Yes, provincial financial projects<br><input type="checkbox"/> Yes, Other: _____              | <input type="checkbox"/> No<br><input type="checkbox"/> Yes, central financed projects<br><input type="checkbox"/> Yes, provincial financial projects<br><input type="checkbox"/> Yes, Other: _____              | <input type="checkbox"/> No<br><input type="checkbox"/> Yes, central financed projects<br><input type="checkbox"/> Yes, provincial financial projects<br><input type="checkbox"/> Yes, Other: _____              |
| 22. What is the economic situation per capita annual income (yuan)?                      | <input type="checkbox"/> Less than 6000<br><input type="checkbox"/> 6000–10,000<br><input type="checkbox"/> 10,000–14,000<br><input type="checkbox"/> 14,000–20,000<br><input type="checkbox"/> More than 20,000 | <input type="checkbox"/> Less than 6000<br><input type="checkbox"/> 6000–10,000<br><input type="checkbox"/> 10,000–14,000<br><input type="checkbox"/> 14,000–20,000<br><input type="checkbox"/> More than 20,000 | <input type="checkbox"/> Less than 6000<br><input type="checkbox"/> 6000–10,000<br><input type="checkbox"/> 10,000–14,000<br><input type="checkbox"/> 14,000–20,000<br><input type="checkbox"/> More than 20,000 |

*Part IV. Conflicts and threats to sustainable development of natural reserve areas*

| Types of conflict and threat                                                                                   | Core area                                                                                                                                                                       | Buffer                                                                                                                                                                          | Test area                                                                                                                                                                       |
|----------------------------------------------------------------------------------------------------------------|---------------------------------------------------------------------------------------------------------------------------------------------------------------------------------|---------------------------------------------------------------------------------------------------------------------------------------------------------------------------------|---------------------------------------------------------------------------------------------------------------------------------------------------------------------------------|
| 23. Is there a lack of talent and ability in nature reserve management                                         | <input type="checkbox"/> Serious problem<br><input type="checkbox"/> General concern<br><input type="checkbox"/> Not a serious concern<br><input type="checkbox"/> Other: _____ | <input type="checkbox"/> Serious problem<br><input type="checkbox"/> General concern<br><input type="checkbox"/> Not a serious concern<br><input type="checkbox"/> Other: _____ | <input type="checkbox"/> Serious problem<br><input type="checkbox"/> General concern<br><input type="checkbox"/> Not a serious concern<br><input type="checkbox"/> Other: _____ |
| 24. Is there a lack of technical and scientific research personnel and inadequate capacity in nature reserves? | <input type="checkbox"/> Serious problem<br><input type="checkbox"/> General concern<br><input type="checkbox"/> Not a serious concern<br><input type="checkbox"/> Other: _____ | <input type="checkbox"/> Serious problem<br><input type="checkbox"/> General concern<br><input type="checkbox"/> Not a serious concern<br><input type="checkbox"/> Other: _____ | <input type="checkbox"/> Serious problem<br><input type="checkbox"/> General concern<br><input type="checkbox"/> Not a serious concern<br><input type="checkbox"/> Other: _____ |
| 25. Is there a lack of science popularization and education talent and                                         | <input type="checkbox"/> Serious problem<br><input type="checkbox"/> General concern<br><input type="checkbox"/> Not a serious concern                                          | <input type="checkbox"/> Serious problem<br><input type="checkbox"/> General concern<br><input type="checkbox"/> Not a serious concern                                          | <input type="checkbox"/> Serious problem<br><input type="checkbox"/> General concern<br><input type="checkbox"/> Not a serious concern                                          |

|                                                                            |                                                                                                                                                                                 |                                                                                                                                                                                 |                                                                                                                                                                                 |
|----------------------------------------------------------------------------|---------------------------------------------------------------------------------------------------------------------------------------------------------------------------------|---------------------------------------------------------------------------------------------------------------------------------------------------------------------------------|---------------------------------------------------------------------------------------------------------------------------------------------------------------------------------|
| inadequate ability in nature reserves?                                     | <input type="checkbox"/> Other: _____                                                                                                                                           | <input type="checkbox"/> Other: _____                                                                                                                                           | <input type="checkbox"/> Other: _____                                                                                                                                           |
| 26. Is there a lack of law enforcement capacity in nature reserves?        | <input type="checkbox"/> Serious problem<br><input type="checkbox"/> General concern<br><input type="checkbox"/> Not a serious concern<br><input type="checkbox"/> Other: _____ | <input type="checkbox"/> Serious problem<br><input type="checkbox"/> General concern<br><input type="checkbox"/> Not a serious concern<br><input type="checkbox"/> Other: _____ | <input type="checkbox"/> Serious problem<br><input type="checkbox"/> General concern<br><input type="checkbox"/> Not a serious concern<br><input type="checkbox"/> Other: _____ |
| 27. Is there inadequate investment in nature reserves?                     | <input type="checkbox"/> Serious problem<br><input type="checkbox"/> General concern<br><input type="checkbox"/> Not a serious concern<br><input type="checkbox"/> Other: _____ | <input type="checkbox"/> Serious problem<br><input type="checkbox"/> General concern<br><input type="checkbox"/> Not a serious concern<br><input type="checkbox"/> Other: _____ | <input type="checkbox"/> Serious problem<br><input type="checkbox"/> General concern<br><input type="checkbox"/> Not a serious concern<br><input type="checkbox"/> Other: _____ |
| 28. Do villagers meet basic survival needs?                                | <input type="checkbox"/> Serious problem<br><input type="checkbox"/> General concern<br><input type="checkbox"/> Not a serious concern<br><input type="checkbox"/> Other: _____ | <input type="checkbox"/> Serious problem<br><input type="checkbox"/> General concern<br><input type="checkbox"/> Not a serious concern<br><input type="checkbox"/> Other: _____ | <input type="checkbox"/> Serious problem<br><input type="checkbox"/> General concern<br><input type="checkbox"/> Not a serious concern<br><input type="checkbox"/> Other: _____ |
| 29. Do villagers earn additional forms of income to develop their economy? | <input type="checkbox"/> Serious problem<br><input type="checkbox"/> General concern<br><input type="checkbox"/> Not a serious concern<br><input type="checkbox"/> Other: _____ | <input type="checkbox"/> Serious problem<br><input type="checkbox"/> General concern<br><input type="checkbox"/> Not a serious concern<br><input type="checkbox"/> Other: _____ | <input type="checkbox"/> Serious problem<br><input type="checkbox"/> General concern<br><input type="checkbox"/> Not a serious concern<br><input type="checkbox"/> Other: _____ |
| 30. Does the local government provide economic development incentives?     | <input type="checkbox"/> Serious problem<br><input type="checkbox"/> General concern<br><input type="checkbox"/> Not a serious concern<br><input type="checkbox"/> Other: _____ | <input type="checkbox"/> Serious problem<br><input type="checkbox"/> General concern<br><input type="checkbox"/> Not a serious concern<br><input type="checkbox"/> Other: _____ | <input type="checkbox"/> Serious problem<br><input type="checkbox"/> General concern<br><input type="checkbox"/> Not a serious concern<br><input type="checkbox"/> Other: _____ |
| 31. Do national and other major construction projects pose a threat?       | <input type="checkbox"/> Serious problem<br><input type="checkbox"/> General concern<br><input type="checkbox"/> Not a serious concern<br><input type="checkbox"/> Other: _____ | <input type="checkbox"/> Serious problem<br><input type="checkbox"/> General concern<br><input type="checkbox"/> Not a serious concern<br><input type="checkbox"/> Other: _____ | <input type="checkbox"/> Serious problem<br><input type="checkbox"/> General concern<br><input type="checkbox"/> Not a serious concern<br><input type="checkbox"/> Other: _____ |
| 32. Are backpackers, tourists, and other outsiders welcome?                | <input type="checkbox"/> Serious problem<br><input type="checkbox"/> General concern<br><input type="checkbox"/> Not a serious concern<br><input type="checkbox"/> Other: _____ | <input type="checkbox"/> Serious problem<br><input type="checkbox"/> General concern<br><input type="checkbox"/> Not a serious concern<br><input type="checkbox"/> Other: _____ | <input type="checkbox"/> Serious problem<br><input type="checkbox"/> General concern<br><input type="checkbox"/> Not a serious concern<br><input type="checkbox"/> Other: _____ |
| 33. Is there a weak ability of nature reserves to support community        | <input type="checkbox"/> Serious problem<br><input type="checkbox"/> General concern<br><input type="checkbox"/> Not a serious concern                                          | <input type="checkbox"/> Serious problem<br><input type="checkbox"/> General concern<br><input type="checkbox"/> Not a serious concern                                          | <input type="checkbox"/> Serious problem<br><input type="checkbox"/> General concern<br><input type="checkbox"/> Not a serious concern                                          |

development?

☐ Other: \_\_\_\_\_

☐ Other: \_\_\_\_\_

☐ Other: \_\_\_\_\_

*Part V. Evaluation of stakeholders and related work by the nature reserve authority*

| Stakeholder                                                               | Role of nature reserve in sustainable development                                                                                                |                                                                                                         |                                                                                            |
|---------------------------------------------------------------------------|--------------------------------------------------------------------------------------------------------------------------------------------------|---------------------------------------------------------------------------------------------------------|--------------------------------------------------------------------------------------------|
| 34. Heads and secretaries of village committees in protected areas        | <input type="checkbox"/> Positive effect, high<br><input type="checkbox"/> Negative effect, high<br>low<br><input type="checkbox"/> Other: _____ | <input type="checkbox"/> Positive effect, general<br><input type="checkbox"/> Negative effects, general | <input type="checkbox"/> Positive effect, low<br><input type="checkbox"/> Negative effect, |
| 35. Other members of village committees in protected areas                | <input type="checkbox"/> Positive effect, high<br><input type="checkbox"/> Negative effect, high<br>low<br><input type="checkbox"/> Other: _____ | <input type="checkbox"/> Positive effect, general<br><input type="checkbox"/> Negative effects, general | <input type="checkbox"/> Positive effect, low<br><input type="checkbox"/> Negative effect, |
| 36. Villagers in protected areas                                          | <input type="checkbox"/> Positive effect, high<br><input type="checkbox"/> Negative effect, high<br>low<br><input type="checkbox"/> Other: _____ | <input type="checkbox"/> Positive effect, general<br><input type="checkbox"/> Negative effects, general | <input type="checkbox"/> Positive effect, low<br><input type="checkbox"/> Negative effect, |
| 37. Village rules and regulations on the utilization of natural resources | <input type="checkbox"/> Positive effect, high<br><input type="checkbox"/> Negative effect, high<br>low<br><input type="checkbox"/> Other: _____ | <input type="checkbox"/> Positive effect, general<br><input type="checkbox"/> Negative effects, general | <input type="checkbox"/> Positive effect, low<br><input type="checkbox"/> Negative effect, |
| 38. Other family regulations and folk agreements of villagers             | <input type="checkbox"/> Positive effect, high<br><input type="checkbox"/> Negative effect, high<br>low<br><input type="checkbox"/> Other: _____ | <input type="checkbox"/> Positive effect, general<br><input type="checkbox"/> Negative effects, general | <input type="checkbox"/> Positive effect, low<br><input type="checkbox"/> Negative effect, |
| 39. Local township (i.e., township) government                            | <input type="checkbox"/> Positive effect, high<br><input type="checkbox"/> Negative effect, high<br>low<br><input type="checkbox"/> Other: _____ | <input type="checkbox"/> Positive effect, general<br><input type="checkbox"/> Negative effects, general | <input type="checkbox"/> Positive effect, low<br><input type="checkbox"/> Negative effect, |
| 40. County (i.e., city) government                                        | <input type="checkbox"/> Positive effect, high<br><input type="checkbox"/> Negative effect, high<br>low<br><input type="checkbox"/> Other: _____ | <input type="checkbox"/> Positive effect, general<br><input type="checkbox"/> Negative effects, general | <input type="checkbox"/> Positive effect, low<br><input type="checkbox"/> Negative effect, |
| 41. Government functional departments such as tourism                     | <input type="checkbox"/> Positive effect, high<br><input type="checkbox"/> Negative effect, high<br>low                                          | <input type="checkbox"/> Positive effect, general<br><input type="checkbox"/> Negative effects, general | <input type="checkbox"/> Positive effect, low<br><input type="checkbox"/> Negative effect, |



|                                                                                                                                     |                                                                                                                                                  |                                                                                                         |                                                                                            |
|-------------------------------------------------------------------------------------------------------------------------------------|--------------------------------------------------------------------------------------------------------------------------------------------------|---------------------------------------------------------------------------------------------------------|--------------------------------------------------------------------------------------------|
|                                                                                                                                     | <input type="checkbox"/> Other: _____                                                                                                            |                                                                                                         |                                                                                            |
| 42. Institutions of higher learning and scientific research institutes carrying out scientific research projects in protected areas | <input type="checkbox"/> Positive effect, high<br><input type="checkbox"/> Negative effect, high<br>low<br><input type="checkbox"/> Other: _____ | <input type="checkbox"/> Positive effect, general<br><input type="checkbox"/> Negative effects, general | <input type="checkbox"/> Positive effect, low<br><input type="checkbox"/> Negative effect, |
| 43. Business institutions for tourism activities in protected areas                                                                 | <input type="checkbox"/> Positive effect, high<br><input type="checkbox"/> Negative effect, high<br>low<br><input type="checkbox"/> Other: _____ | <input type="checkbox"/> Positive effect, general<br><input type="checkbox"/> Negative effects, general | <input type="checkbox"/> Positive effect, low<br><input type="checkbox"/> Negative effect, |
| 44. Protecting tourists in the zone                                                                                                 | <input type="checkbox"/> Positive effect, high<br><input type="checkbox"/> Negative effect, high<br>low<br><input type="checkbox"/> Other: _____ | <input type="checkbox"/> Positive effect, general<br><input type="checkbox"/> Negative effects, general | <input type="checkbox"/> Positive effect, low<br><input type="checkbox"/> Negative effect, |
| 45. Non-governmental organizations developing section universal protection projects in protected areas                              | <input type="checkbox"/> Positive effect, high<br><input type="checkbox"/> Negative effect, high<br>low<br><input type="checkbox"/> Other: _____ | <input type="checkbox"/> Positive effect, general<br><input type="checkbox"/> Negative effects, general | <input type="checkbox"/> Positive effect, low<br><input type="checkbox"/> Negative effect, |
| 46. Community co-management of nature reserves                                                                                      | <input type="checkbox"/> Positive effect, high<br><input type="checkbox"/> Negative effect, high<br>low<br><input type="checkbox"/> Other: _____ | <input type="checkbox"/> Positive effect, general<br><input type="checkbox"/> Negative effects, general | <input type="checkbox"/> Positive effect, low<br><input type="checkbox"/> Negative effect, |

*Part VI. Key management activities of the nature reserve authority*

| Management activities                                                                  | 2016                                                                                                                                                | 2017                                                                                                                                                | 2018                                                                                                                                                |
|----------------------------------------------------------------------------------------|-----------------------------------------------------------------------------------------------------------------------------------------------------|-----------------------------------------------------------------------------------------------------------------------------------------------------|-----------------------------------------------------------------------------------------------------------------------------------------------------|
| 47. Are protected areas and communities working on forest fire prevention?             | <input type="checkbox"/> Yes<br><input type="checkbox"/> No                                                                                         | <input type="checkbox"/> Yes<br><input type="checkbox"/> No                                                                                         | <input type="checkbox"/> Yes<br><input type="checkbox"/> No                                                                                         |
| If so, what is the effect?                                                             | <input type="checkbox"/> Good effect<br><input type="checkbox"/> Bad<br><input type="checkbox"/> Generally, no<br><input type="checkbox"/> Not sure | <input type="checkbox"/> Good effect<br><input type="checkbox"/> Bad<br><input type="checkbox"/> Generally, no<br><input type="checkbox"/> Not sure | <input type="checkbox"/> Good effect<br><input type="checkbox"/> Bad<br><input type="checkbox"/> Generally, no<br><input type="checkbox"/> Not sure |
| 48. Are anti-poaching activities carried out jointly by the reserve and the community? | <input type="checkbox"/> Yes<br><input type="checkbox"/> No                                                                                         | <input type="checkbox"/> Yes<br><input type="checkbox"/> No                                                                                         | <input type="checkbox"/> Yes<br><input type="checkbox"/> No                                                                                         |
| If so, what is the effect?                                                             | <input type="checkbox"/> Good effect<br><input type="checkbox"/> Generally, no                                                                      | <input type="checkbox"/> Good effect<br><input type="checkbox"/> Generally, no                                                                      | <input type="checkbox"/> Good effect<br><input type="checkbox"/> Generally, no                                                                      |

|                                                                                              |                                                                                                                                                                                         |                                                                                                                                                                                         |                                                                                                                                                                                         |
|----------------------------------------------------------------------------------------------|-----------------------------------------------------------------------------------------------------------------------------------------------------------------------------------------|-----------------------------------------------------------------------------------------------------------------------------------------------------------------------------------------|-----------------------------------------------------------------------------------------------------------------------------------------------------------------------------------------|
|                                                                                              | <input type="checkbox"/> Bad <input type="checkbox"/> Not sure                                                                                                                          | <input type="checkbox"/> Bad <input type="checkbox"/> Not sure                                                                                                                          | <input type="checkbox"/> Bad <input type="checkbox"/> Not sure                                                                                                                          |
| 49. Are protected areas and communities jointly carry out anti-theft and felling activities? | <input type="checkbox"/> Yes<br><input type="checkbox"/> No                                                                                                                             | <input type="checkbox"/> Yes<br><input type="checkbox"/> No                                                                                                                             | <input type="checkbox"/> Yes<br><input type="checkbox"/> No                                                                                                                             |
| If so, what is the effect?                                                                   | <input type="checkbox"/> Good effect <input type="checkbox"/> Generally, no effect<br><input type="checkbox"/> Bad <input type="checkbox"/> Not sure                                    | <input type="checkbox"/> Good effect <input type="checkbox"/> Generally, no effect<br><input type="checkbox"/> Bad <input type="checkbox"/> Not sure                                    | <input type="checkbox"/> Good effect <input type="checkbox"/> Generally, no effect<br><input type="checkbox"/> Bad <input type="checkbox"/> Not sure                                    |
| 50. Should patrol work be carried out in nature reserves?                                    | <input type="checkbox"/> Yes<br><input type="checkbox"/> No                                                                                                                             | <input type="checkbox"/> Yes<br><input type="checkbox"/> No                                                                                                                             | <input type="checkbox"/> Yes<br><input type="checkbox"/> No                                                                                                                             |
| If so, what would be the effect?                                                             | <input type="checkbox"/> Good effect <input type="checkbox"/> Generally, no effect<br><input type="checkbox"/> Bad <input type="checkbox"/> Not sure                                    | <input type="checkbox"/> Good effect <input type="checkbox"/> Generally, no effect<br><input type="checkbox"/> Bad <input type="checkbox"/> Not sure                                    | <input type="checkbox"/> Good effect <input type="checkbox"/> Generally, no effect<br><input type="checkbox"/> Bad <input type="checkbox"/> Not sure                                    |
| If so, how often?                                                                            | <input type="checkbox"/> Numerous times per month<br><input type="checkbox"/> Once a month<br><input type="checkbox"/> Once every three months<br><input type="checkbox"/> Other: _____ | <input type="checkbox"/> Numerous times per month<br><input type="checkbox"/> Once a month<br><input type="checkbox"/> Once every three months<br><input type="checkbox"/> Other: _____ | <input type="checkbox"/> Numerous times per month<br><input type="checkbox"/> Once a month<br><input type="checkbox"/> Once every three months<br><input type="checkbox"/> Other: _____ |
| 51. Should nature reserves be monitored?                                                     | <input type="checkbox"/> Yes<br><input type="checkbox"/> No                                                                                                                             | <input type="checkbox"/> Yes<br><input type="checkbox"/> No                                                                                                                             | <input type="checkbox"/> Yes<br><input type="checkbox"/> No                                                                                                                             |
| If so, what is the effect?                                                                   | <input type="checkbox"/> Good effect <input type="checkbox"/> Generally, no effect<br><input type="checkbox"/> Bad <input type="checkbox"/> Not sure                                    | <input type="checkbox"/> Good effect <input type="checkbox"/> Generally, no effect<br><input type="checkbox"/> Bad <input type="checkbox"/> Not sure                                    | <input type="checkbox"/> Good effect <input type="checkbox"/> Generally, no effect<br><input type="checkbox"/> Bad <input type="checkbox"/> Not sure                                    |
| If so, what is the effect?                                                                   | <input type="checkbox"/> Numerous times per month<br><input type="checkbox"/> Once a month<br><input type="checkbox"/> Once every three months<br><input type="checkbox"/> Other: _____ | <input type="checkbox"/> Numerous times per month<br><input type="checkbox"/> Once a month<br><input type="checkbox"/> Once every three months<br><input type="checkbox"/> Other: _____ | <input type="checkbox"/> Numerous times per month<br><input type="checkbox"/> Once a month<br><input type="checkbox"/> Once every three months<br><input type="checkbox"/> Other: _____ |
| 52. Are poaching incidents punished in protected areas?                                      | <input type="checkbox"/> Yes<br><input type="checkbox"/> No                                                                                                                             | <input type="checkbox"/> Yes<br><input type="checkbox"/> No                                                                                                                             | <input type="checkbox"/> Yes<br><input type="checkbox"/> No                                                                                                                             |
| If so, detention cases                                                                       | Total number:                                                                                                                                                                           | Total number:                                                                                                                                                                           | Total number:                                                                                                                                                                           |
| If so, sentencing cases                                                                      | Total number:                                                                                                                                                                           | Total number:                                                                                                                                                                           | Total number:                                                                                                                                                                           |
| 53. Is stealing and cutting incidents penalized within protected areas?                      | <input type="checkbox"/> Yes<br><input type="checkbox"/> No                                                                                                                             | <input type="checkbox"/> Yes<br><input type="checkbox"/> No                                                                                                                             | <input type="checkbox"/> Yes<br><input type="checkbox"/> No                                                                                                                             |
| If so, detention cases                                                                       | Total number:                                                                                                                                                                           | Total number:                                                                                                                                                                           | Total number:                                                                                                                                                                           |
| If so, sentencing cases                                                                      | Total number:                                                                                                                                                                           | Total number:                                                                                                                                                                           | Total number:                                                                                                                                                                           |
| 54. Is occupation of woodland a penalty in protected areas?                                  | <input type="checkbox"/> Yes<br><input type="checkbox"/> No                                                                                                                             | <input type="checkbox"/> Yes<br><input type="checkbox"/> No                                                                                                                             | <input type="checkbox"/> Yes<br><input type="checkbox"/> No                                                                                                                             |
| If so, detention cases                                                                       | Total number:                                                                                                                                                                           | Total number:                                                                                                                                                                           | Total number:                                                                                                                                                                           |

|                                                                    |                                                             |                                                             |                                                             |
|--------------------------------------------------------------------|-------------------------------------------------------------|-------------------------------------------------------------|-------------------------------------------------------------|
| If so, sentencing cases                                            | Total number:                                               | Total number:                                               | Total number:                                               |
| 55. Is discharging of pollution punishable within protected areas? | <input type="checkbox"/> Yes<br><input type="checkbox"/> No | <input type="checkbox"/> Yes<br><input type="checkbox"/> No | <input type="checkbox"/> Yes<br><input type="checkbox"/> No |
| If so, detention cases                                             | Total number:                                               | Total number:                                               | Total number:                                               |
| If so, sentencing cases                                            | Total number:                                               | Total number:                                               | Total number:                                               |

**Supplementary Data 1.** Questionnaire on management and utilization of national nature reserve and surrounding communities and collective forests

*I. Basic information of nature reserves*

- (1) Name:
- (2) Founding year:  
Time of promotion to national nature reserve (year):
- (3) Area (hectare)  
Classification I (Zoning):  
Classification II (Land type):  
Classification III (Ownership):
- (4) Protected objects:
- (5) Should national nature reserves allow access to protected areas? ☐ Yes ☐ No
- (6) Are there human and biosphere reserves? ☐ Yes ☐ No
- (7) What are the relations between protected areas and surrounding communities? ☐ Good ☐ Generally, no concerns ☐ Bad
- (8) What is the relationship between protected areas and local government (i.e., county and municipal level)? ☐ Good ☐ Generally, no concerns ☐ Bad
- (9) What is the government level of the protected area authority? ☐ Rank of section chief ☐ Deputy department director ☐ Section chief ☐ Other
- (10) Number of all staff members of the Bureau of Protected Areas (i.e., persons)  
Classification I (preparation): formal\_\_\_\_ informal\_\_\_\_  
Classification II (post): administration\_\_\_\_ technology\_\_\_\_ Other\_\_\_\_  
Classification III (education): graduate student\_\_\_\_ Undergraduate\_\_\_\_ Junior college and high school\_\_\_\_ Other\_\_\_\_  
Classification IV (number of people specializing in community work):\_\_\_\_
- (11) Number of vehicles of the protected area authority (i.e., vehicles):

*II. Basic information of the area and community where the nature reserve is located*

- (1) Names of the counties and cities in which they are located (listed together):\_\_\_\_
- (2) Name of the town concerned:
- (3) Number of administrative villages involved (individual):  
Classification: All in protected areas:  
Economic situation (in the county where the reserve is located): ☐ Good ☐ Generally, no concerns ☐ Bad  
Part in nature reserves:\_\_\_\_  
Economic situation (ibid.): ☐ Good ☐ Generally, no concerns ☐ Bad  
Contiguous only to protected areas:\_\_\_\_  
Economic situation (ibid.): ☐ Good ☐ Generally, no concerns ☐ Bad

- (4) Total population:\_\_\_\_  
 Classification: protected area:\_\_\_\_ Community bordering the reserve:\_\_\_\_
- (5) Farthest distance from the village committee in the district to the county center (km):\_\_\_\_  
 Road conditions: ☐ Good ☐ Generally, no concerns ☐ Bad  
 Nearest distance from the village committee to the County Center (km):\_\_\_\_  
 Road conditions: ☐ Good ☐ Generally, no concerns ☐ Bad
- (6) Sources of village income (the three most important ones):  
☐ Manual work ☐ Agricultural breeding ☐ Forestry planting and raising industry ☐ Having another business ☐ Other  
 Income sources of surrounding villagers (the most important three):  
☐ Manual work ☐ Agricultural breeding ☐ Forestry planting and raising industry ☐ Having another business ☐ Other
- (7) Dependence of villages in the protection zone on resources (i.e., High = 50% of total income, General = 20% to 40%, Low = less than 20%)  
 Dependence on wood resources: ☐ High ☐ General ☐ Low  
 Dependence on bamboo resources: ☐ High ☐ General ☐ Low  
 Dependence on wild medicinal resources: ☐ High ☐ General ☐ Low  
 Dependence on wild vegetable and fungus resources: ☐ High ☐ General ☐ Low  
 Dependence on flower resources: ☐ High ☐ General ☐ Low  
 Dependence on tea resources: ☐ High ☐ General ☐ Low  
 Dependence on honey resources: ☐ High ☐ General ☐ Low  
 Dependence on other resources: ☐ High ☐ General ☐ Low
- (8) Dependence of villages around the protection zone on resources (i.e., High = 50% of total income, General = 20% to 40%, Low = less than 20%)  
 Dependence on wood resources: ☐ High ☐ General ☐ Low  
 Dependence on bamboo resources: ☐ High ☐ General ☐ Low  
 Dependence on wild medicinal resources: ☐ High ☐ General ☐ Low  
 Dependence on wild vegetable and fungus resources: ☐ High ☐ General ☐ Low  
 Dependence on flower resources: ☐ High ☐ General ☐ Low  
 Dependence on tea resources: ☐ High ☐ General ☐ Low  
 Dependence on honey resources: ☐ High ☐ General ☐ Low  
 Dependence on other resources: ☐ High ☐ General ☐ Low
- (9) Main energy sources for cooking in villages in the reserve: ☐ Firewood ☐ Electric ☐ Energy ☐ Other  
 Main energy sources of stir-fried vegetables in villages in protected areas are as follows: ☐ Firewood ☐ Electric ☐ Energy ☐ Other  
 Most important energy source for cooking in the villages around the reserve: ☐ Firewood ☐ Electric ☐ Energy ☐ Other  
 Main energy sources of stir-fried vegetables in villages around the reserve are as follows: ☐ Firewood ☐ Electric ☐ Energy ☐ Other
- (10) Are there many illiterate villages in the reserve? ☐ Many ☐ Moderate ☐ Not high
- (11) Are there many illiterate villages around the reserve? ☐ Many ☐ Moderate ☐ Not high

- (12) What is the forestry management capability of villagers in protected areas? ☐ Good ☐ Moderate ☐ Bad  
 What is the forestry management ability of villagers around protected areas? ☐ Good ☐ Moderate ☐ Bad
- (13) What is the forestry technical capabilities of villagers in the protected area? ☐ Good ☐ Moderate ☐ Bad  
 What is the forestry technical ability of villagers around the protected area? ☐ Good ☐ Moderate ☐ Bad
- (14) What is the proportion of unmarried villagers of age in the protected area? ☐ Many ☐ Moderate ☐ Not high  
 What is the proportion of unmarried villagers around the protection zone? ☐ Many ☐ Moderate ☐ Not high
- (15) What is the ability of responsible persons of village committees in protected areas? ☐ High ☐ Moderate ☐ Low  
 What is the ability to be in charge of village committees around the protected area? ☐ High ☐ Moderate ☐ Low
- (16) Are there specialized farmer cooperatives in the villages within the protected areas? ☐ Yes ☐ No ☐ Not sure
- (17) Are there farmer professional cooperatives in the villages around the protection zone? ☐ Yes ☐ No ☐ Not sure

### III. Basic information of collective forests and their management in nature reserves

- (1) What is the Area of collective forest in the nature reserves (hectares):\_\_\_\_  
 Classification I: plantation area\_\_\_\_ bamboo forest\_\_\_\_ arbor forest\_\_\_\_ bush\_\_\_\_  
 Classification 2: economic forest area\_\_\_\_ fruit tree\_\_\_\_ tea plant\_\_\_\_ tea tree\_\_\_\_  
 Classification III: core area\_\_\_\_ buffer area\_\_\_\_ test area\_\_\_\_  
 Classification IV: area of national public welfare forests\_\_\_\_ (and compensation standard)\_\_\_\_  
 area of local public welfare forest\_\_\_\_ (and compensation standard)\_\_\_\_
- (2) What is the collective forest quality in the protected area (compared with other collective forest quality in the community)? ☐ High ☐ Moderate ☐ Low
- (3) What is the economic value of collective forests in protected areas? ☐ High ☐ Moderate ☐ Low
- (4) What is the proportion of collective forests in protected areas to collective forests owned by villagers? ☐ High ☐ Moderate ☐ Low
- (5) Should collective forests in protected areas have participated in a new round of collective forest right system reform? ☐ Yes ☐ No ☐ Not sure
- (6) Should collective forest in the protected area have signed the entrusted management agreement? ☐ Yes ☐ No ☐ Not sure  
 If so, should villagers approve the entrustment agreement? ☐ Yes ☐ No ☐ Not sure
- (7) Should the boundary between collective forests in the area and state-owned forests and other state-owned lands is clear? ☐ Yes ☐ No ☐ Not sure
- (8) Should the boundary between the nature reserve and the surrounding village land (including woodland) is clear? ☐ Yes ☐ No ☐ Not sure
- (9) Should villagers have the right to use collective forests in the protected areas? ☐ No ☐ Yes, fully ☐ Yes, partially ☐ Not sure

### IV. Community Co-management in Nature Reserves

- (1) What is the relationship between protected areas and surrounding villages: ☐ Good ☐ Moderate ☐ Bad
- (2) Do villagers understand the nature reserve rules and regulations? ☐ No ☐ Yes, fully ☐ Yes, partially ☐ Not sure
- (3) Should villagers participate in the management of nature reserves? ☐ No ☐ Yes, fully ☐ Yes, partially ☐ Not sure
- (4) Should villagers be willing to participate in the management of nature reserves? ☐ No ☐ Yes, fully ☐ Yes, partially ☐ Not sure

- (5) Should villagers be given the opportunity to participate in the management of nature reserves? ☐ No ☐ Yes, fully ☐ Yes, partially ☐ Not sure
- (6) Have alternative livelihood activities from nature reserves supported local communities? ☐ No ☐ Yes, fully ☐ Yes, partially ☐ Not sure
- (7) When did the community co-management activities start? \_\_\_\_\_  
 Is it still under way? No \_\_\_\_\_ Yes, not activity content \_\_\_\_\_
- (8) Should there be a cooperative committee, (if so how active should it be)? ☐ No ☐ Yes, very active ☐ Yes, moderately active ☐ Yes, not very active
- (9) Should there be a resource co-management plan? ☐ Yes ☐ No

*V. Events of the nature reserve in the past ten years (Noted at the end of the questionnaire)*

- (1) Main scientific research cooperation projects and units?  
 Project: National positioning and observation of red soil hilly ecosystem in Changting, Fujian Province  
 Cooperation unit: Fujian Agriculture and Forestry University  
 Project: scientific investigation of Tingjiangyuan National Nature Reserve in Fujian Province  
 Partner: Xiamen University
- (2) Protection organizations (international and domestic) and cooperation contents
- (3) Major events concerning management institutions of protected areas (expansion, institutional reform, etc.)
- (4) Adjustment of functional zoning of protected areas (expansion and reduction, etc.)
- (5) Community management in protected areas (report on community co-management work, major contradictions and conflicts with the community at present)
- (6) Sources of investment in protected areas
- (7) Other Important Issues Restricting the Sustainable Development of Protected Areas
